# Supplementary material for: Automated volumetric modulated arc therapy planning for whole pelvic prostate radiotherapy
Source: Springer Nature journal article supplement (doi:10.1007/s00066-017-1246-2), 2017-12-21
Supplement: MOESM1 [file 15326804]

## **Supplementary material for:**

### **Automated VMAT planning for sequential-boost whole pelvic prostate radiotherapy**

*Strahlentherapie und Onkologie*

By <sup>1</sup>M. Buschmann\*, <sup>2</sup>A. Sharfo, <sup>2</sup>J. Penninkhof, <sup>1</sup>Y. Seppenwoolde, <sup>1</sup>G. Goldner, <sup>1</sup>D. Georg,  
<sup>2</sup>S. Breedveld and <sup>2</sup>B. Heijmen

\*corresponding author: martin.buschmann@akhwien.at

<sup>1</sup>Department of Radiation Oncology and Christian Doppler Laboratory for Medical Radiation Research  
for Radiation Oncology Medical University of Vienna/AKH Wien, Vienna, Austria

<sup>2</sup>Department of Radiation Oncology, Erasmus MC Cancer Institute, Rotterdam, The Netherlands

### ***Automated VMAT planning with Erasmus-iCycle/Monaco:***

Automated treatment plan generation with Erasmus-iCycle for an individual patient is based on a site-specific 'wish-list' containing the clinical plan objectives with ascribed priorities and hard constraints to be strictly obeyed. The wish-list used for the whole pelvis contains constraints to control maximum and mean dose in the targets and OARs, and dose fall-off outside the PTV. PTV coverage and its homogeneous dose distribution are optimized using the Logarithmic Tumor Control Probability (LTCP) function [1] with the highest priority (priorities 1 and 2), followed by a shell around the PTV to create a conformal dose distribution (priority 3). Equivalent uniform dose (EUD) [2] objectives with volume effect parameter ( $k = 12$  and  $4$ ) focusing on reduction of the high and midrange dose in the rectum and bladder, respectively (priorities 4 and 5). Two more shells around the PTV (priority 6 in Table 2a) were defined to make a conformal dose distribution. To reduce mid-to high-range dose in the bowel bag another EUD with ( $k = 8$ ) was defined (priority 7). A skin ring of 2 cm wide, from the body contour towards the patient's internal was defined to control entrance doses (priority 8). Mean dose in the rectum, bladder and bowel bag were then reduced with priorities 9,10, and 11. For the left and right femoral heads, EUD objectives were used as shown in Table 2a. After plan optimization in Erasmus-iCycle, a template containing the achieved results for constraints and objectives is automatically created and fed into the clinical TPS (Monaco v5.11, Elekta AB, Sweden) to generate, without planner interaction, clinically deliverable dual-arc VMAT plans.

The following segmentation settings in Monaco were used and kept constant for all automated and manual plan in both planning phases:

fluence smoothing = medium

max # of control points per arc = 230

min. segment width = 1 cm

sector increment = 30°

[1] Alber M, Reemtsen R (2007) Intensity modulated radiotherapy treatment planning by use of a barrier-penalty multiplier method. *Opt Methods Softw* 22:391-411.

[2] Niemierko A (1997) Reporting and analyzing dose distributions: a concept of equivalent uniform dose. *Med Phys* 24:103-10.

### Manual VMAT planning with Monaco:

In the following tables the cost function templates for manual planning in Monaco are presented. Plan optimizations were initiated with these population-based templates and in the next iterative steps functions and parameters were manually tweaked to obtain the best possible dose distributions.

**Table 1S:** Applied Monaco template for manual VMAT plan generation for phase 1 (i.e., whole pelvis) plan.

| Volume                           | Type               | Dose level | Parameters               | Shrink margin |
|----------------------------------|--------------------|------------|--------------------------|---------------|
| <b>PTV<sub>p</sub></b>           | Target EUD         | 60 Gy      | Cell sensitivity: 0.5    |               |
|                                  | Quadratic overdose | 61 Gy      | RMS Dose excess: 0.17 Gy |               |
|                                  | Target penalty     | 58.8 Gy    | Min. volume: 99%         |               |
| <b>PTV<sub>LN</sub></b>          | Target EUD         | 50 Gy      | Cell sensitivity: 0.5    |               |
|                                  | Quadratic overdose | 51 Gy      | RMS Dose excess: 0.3 Gy  | 0.5 cm        |
|                                  | Quadratic overdose | 52 Gy      | RMS Dose excess: 0.1 Gy  | 0.5 cm        |
|                                  | Target penalty     | 49.5 Gy    | Min. volume: 99%         |               |
| <b>Rectum</b>                    | Serial             | 46 Gy      | PLE 15                   |               |
|                                  | Serial             | 32 Gy      | PLE 10                   | 1 cm          |
| <b>Bladder</b>                   | Serial             | 41 Gy      | PLE 10                   |               |
|                                  | Serial             | 32 Gy      | PLE 6                    | 1 cm          |
| <b>Bowel</b>                     | Serial             | 34 Gy      | PLE 10                   |               |
|                                  | Quadratic overdose | 50 Gy      | RMS Dose excess: 0.1 Gy  |               |
| <b>Le.+Ri. Femoral Head Body</b> | Serial             | 24 Gy      | PLE 6                    |               |
|                                  | Quadratic overdose | 53 Gy      | RMS Dose excess: 0.08 Gy |               |
|                                  | Quadratic overdose | 41 Gy      | RMS Dose excess: 0.17 Gy | 0.6 cm        |
|                                  | Quadratic overdose | 28 Gy      | RMS Dose excess: 0.7 Gy  | 1.5 cm        |

*Abbreviations:* PTV<sub>p</sub> = planning target volume of the prostate, PTV<sub>LN</sub> = planning target volume of the lymph nodes, EUD = Equivalent Uniform Dose, PLE = Power Law Exponent, RMS = Root Mean Square.

**Table 2S:** Applied Monaco template for manual VMAT plan generation for phase 2 (i.e., boost) plan.

| <b>Volume</b>          | <b>Type</b>        | <b>Dose level</b> | <b>Parameter</b>         | <b>Shrink margin</b> |
|------------------------|--------------------|-------------------|--------------------------|----------------------|
| <b>PTV<sub>p</sub></b> | Target EUD         | 13 Gy             | Cell sensitivity: 0.5    |                      |
|                        | Quadratic overdose | 13.1 Gy           | RMS Dose excess: 0.3 Gy  |                      |
|                        | Target penalty     | 12.9 Gy           | Min. volume: 98%         |                      |
| <b>Rectum</b>          | Serial             | 10 Gy             | PLE 15                   |                      |
|                        | Serial             | 5 Gy              | PLE 10                   | 1 cm                 |
| <b>Bladder</b>         | Serial             | 9 Gy              | PLE 10                   |                      |
| <b>Le.+Ri.</b>         | Serial             | 3 Gy              | PLE 6                    |                      |
| <b>Femoral Head</b>    |                    |                   |                          |                      |
| <b>Body</b>            | Quadratic overdose | 10 Gy             | RMS Dose excess: 0.16 Gy |                      |
|                        | Quadratic overdose | 5 Gy              | RMS Dose excess: 0.3 Gy  | 1.5 cm               |

*Abbreviations:* PTV<sub>p</sub> = planning target volume of the prostate, EUD = Equivalent Uniform Dose, PLE = Power Law Exponent, RMS = Root Mean Square.
